# Supplementary material for: Characterization and differential expression of DNA methyltransferase and demethylase genes in response to abiotic stress in Isodon rubescens
Source: Research Square preprint supplement (doi:10.21203/rs.3.rs-5631078/v1), 2025-04-28
Supplement: Supplementary file 1 [file 03c04ae1e7bb66531bfff929.xlsx]

## Sheet: Sheet1
Table S4. The methodological investigation of UPLC
	Precision (RSD%)	Stability (RSD%)	Repeatability (RSD%)
dC	1.40578	0.919884	1.59614
5mdC	1.37092	1.16892	1.32179
Lasiodonin	1.64277	1.86618	1.76075
Rosthorin A	1.78095	1.33202	1.82602
Rosmarinic acid	0.581615	1.85155	1.23715
Oridonin	1.75993	1.10071	0.861998
