# Supplementary material for: Characterization and differential expression of DNA methyltransferase and demethylase genes in response to abiotic stress in Isodon rubescens
Source: Research Square preprint supplement (doi:10.21203/rs.3.rs-5631078/v1), 2025-04-28
Supplement: Supplementary file 1 [file 050f2feffbb0b11f320e19b5.pdf]

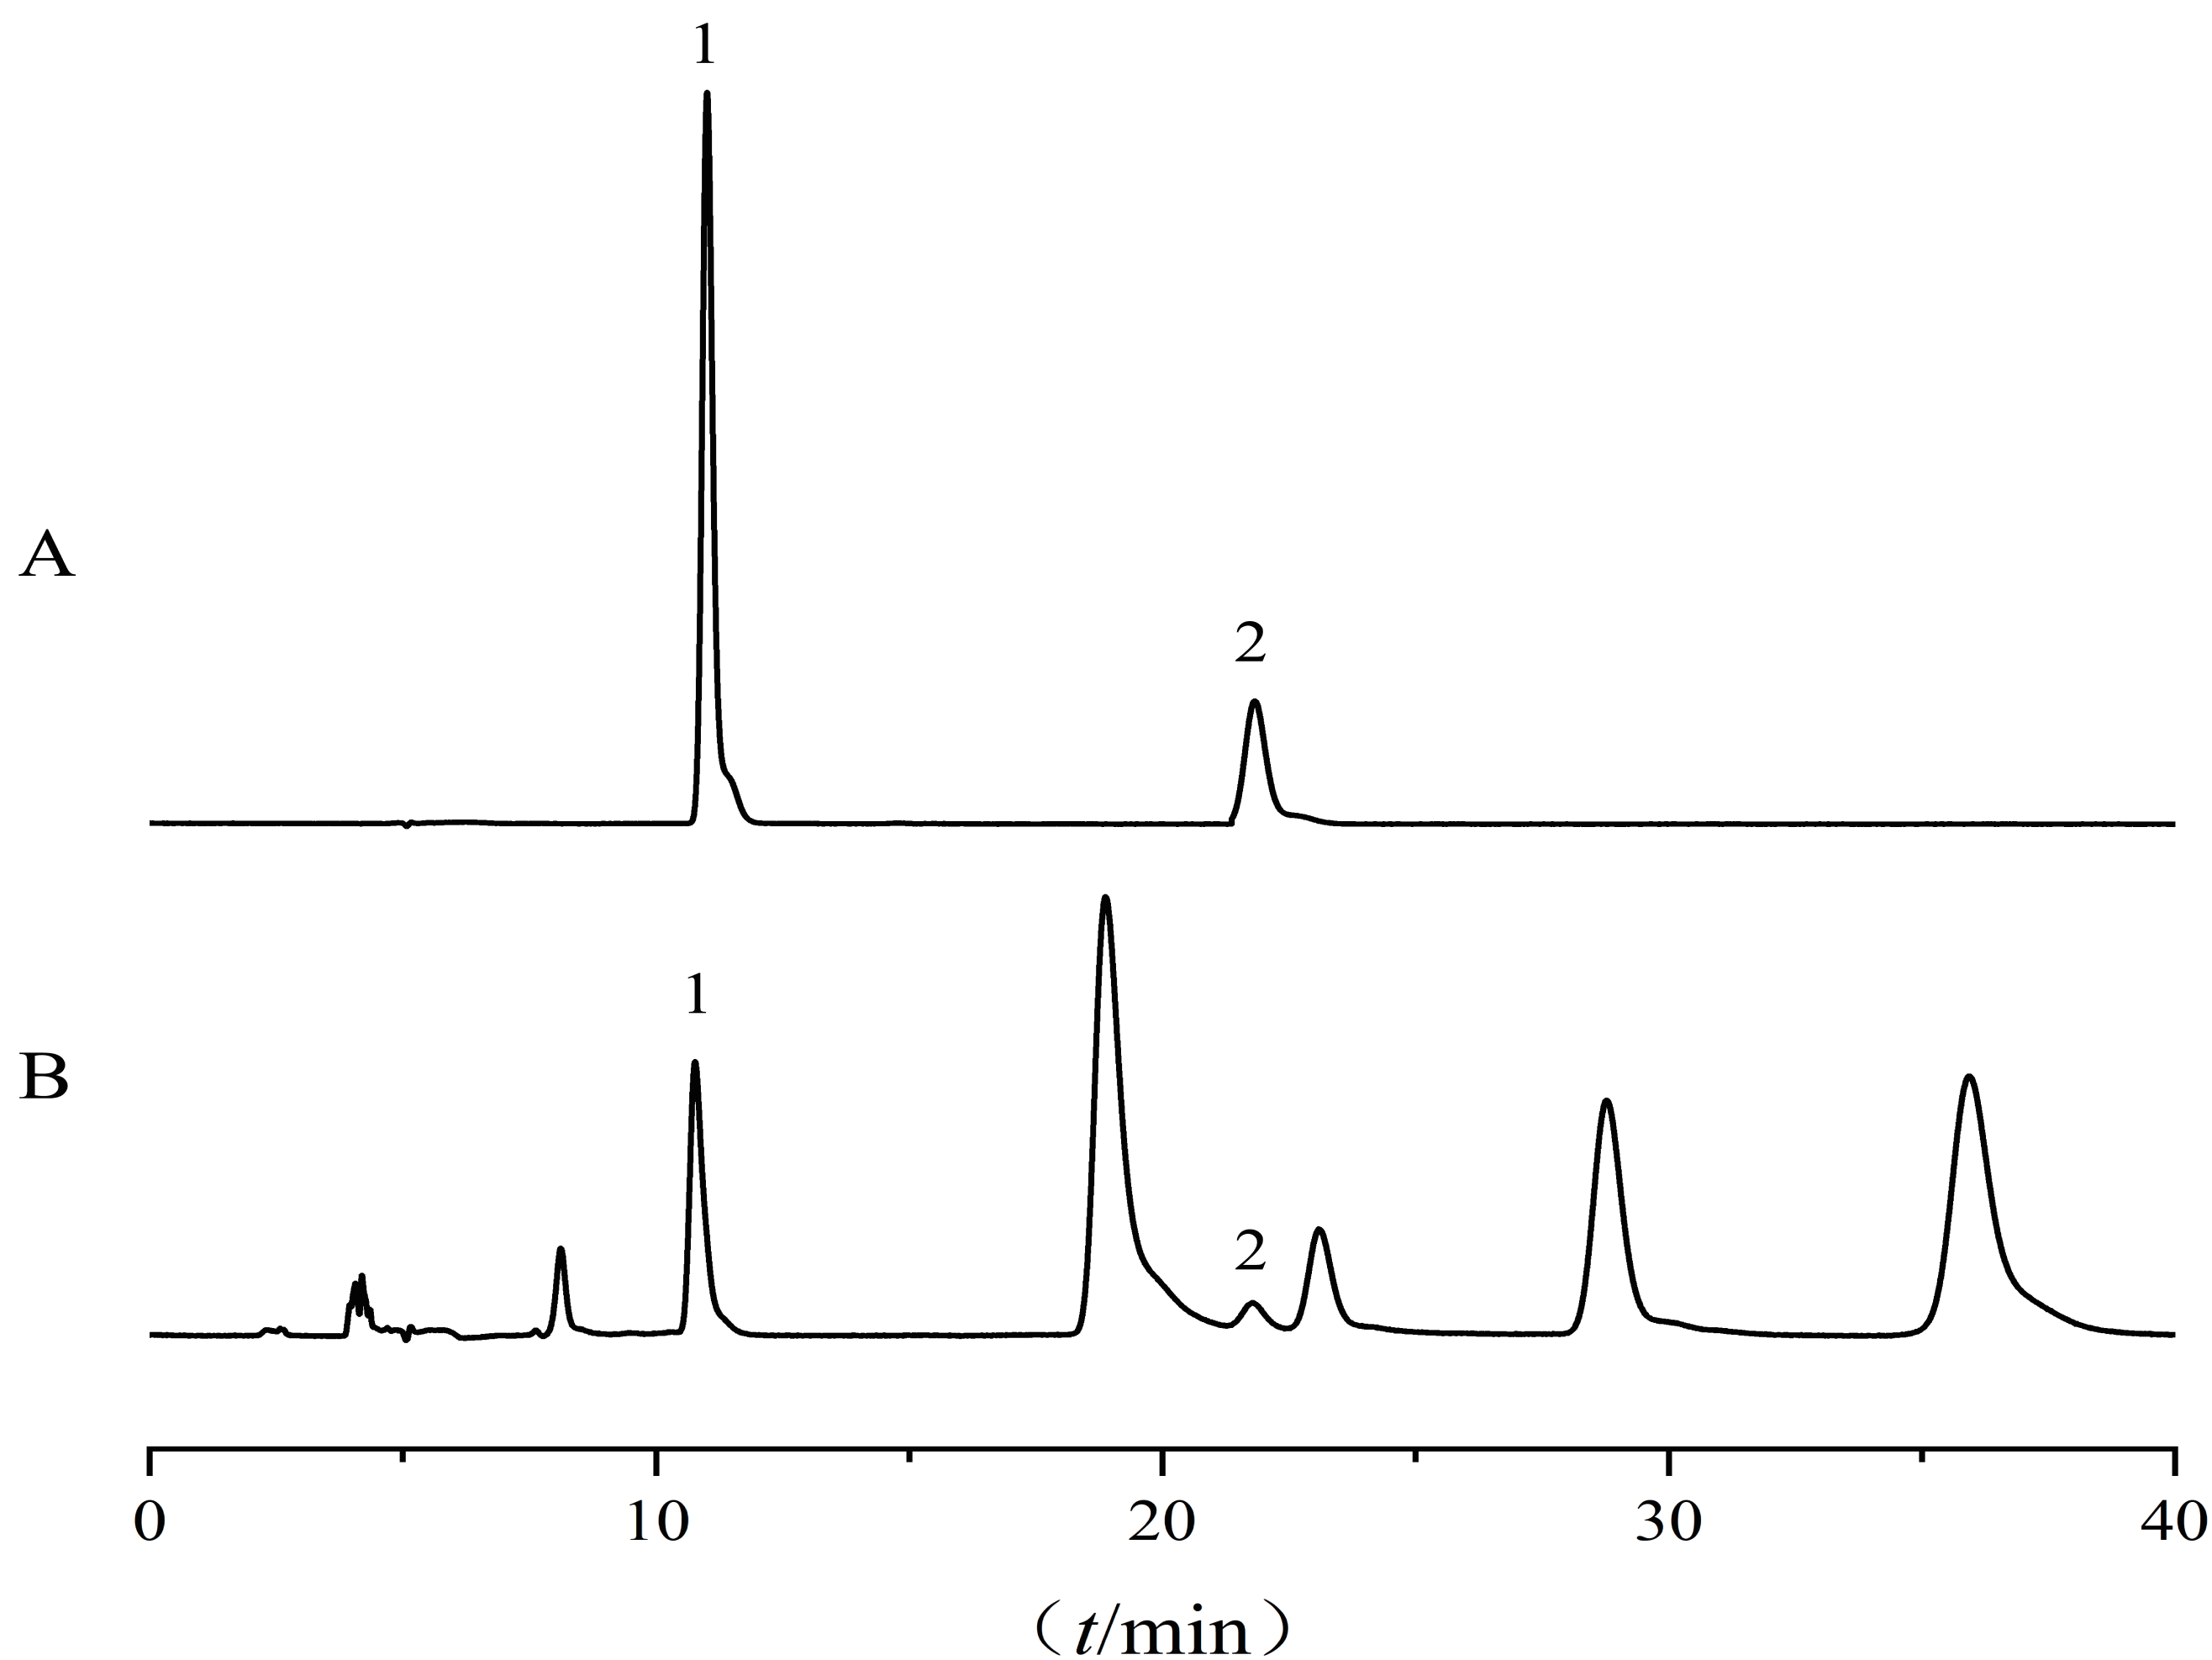

Fig. S7 UPLC chromatogram of mixing reference solutions (1. dC, 2. 5mdC) and the *I. rubescens* samples of control group
