# Supplementary material for: Characterization and differential expression of DNA methyltransferase and demethylase genes in response to abiotic stress in Isodon rubescens
Source: Research Square preprint supplement (doi:10.21203/rs.3.rs-5631078/v1), 2025-04-28
Supplement: Supplementary file 2 [file 297988d8ad4336a551ec75ca.xlsx]

## Sheet: Sheet1
Table S3. The standard curves of dC, 5mdC, oridonin, lasiodonin, rosthorin A, and rosmarinic acid.
dC	y = 0.0374x + 0.1201	_x000b_R2 = 0.9999
5mdC	y = 0.024x + 0.0321_x000b_	R2 = 0.9998
Oridonin	y=165.4x-0.2874	R2 = 0.9994
Rosmarinic acid	y=141.34x-0.8877	R2 = 0.9991
Rosthorin A	y=43.865x+0.3448	R2 = 0.9995
Lasiodonin	y=55.588x+0.1227	R2 = 0.9994
