# Supplementary material for: Characterization and differential expression of DNA methyltransferase and demethylase genes in response to abiotic stress in Isodon rubescens
Source: Research Square preprint supplement (doi:10.21203/rs.3.rs-5631078/v1), 2025-04-28
Supplement: Supplementary file 3 [file 45e442594bec8d04ef61a34c.xlsx]

## Sheet: Sheet1
Table S6. Primers information of the Actin, IrC5-Mtase and IrdMTase.
Gene ID	Gene name	Upstream primer (5’ -3’)F	Downstream primer (5’ - 3’) R
	Actin	ATGGAGCCTCCAATCCAGACACTGT	ATTCCGTTGCCCTGAGGTGCTCTT
RrubChr2G00045580.1	IrMET1	GCAGGCAACTACAACAAGGCTAATC	TCGCTCCTTCATCCAATGTCTCAG
RrubChr3G00062560.1	IrCMT1	AGAGCGAGACAGCCAGAATAACAG	AGATCAAACACCAAGCCATCAACAG
RrubChr9G00229020.1	IrCMT2a	CAGCCAGCTCCACCAGTTCAG	CCGCAGTCGCTCATCCTACAC
RrubChr6G00161120.1	IrCMT2b	GGATTATGGCTGCTGGTTGCTATG	GAGTAGGAAGAGGAAACTGGGGTAG
RrubChr6G00159240.1	IrCMT3	GTTGAGAATGATGAGGAGCGTGATG	TCTTTGCCTTATGAAGTGCTGGAAC
RrubChr2G00043030.1	IrDRM1	CTGTGCGACTGCCAGGAAGAG	TGAGAGGTGGAAGAGGTATGAGAGG
RrubChr7G00164870.1	IrDRM2	GTGCTGTCATTCTTCAGTGGGATTG	TCTTCAACATTCGCCGCTTCATATC
RrubChr6G00146650.1	IrDNMT2	CAAGACGCTGCTGTTGCTTCAC	TACTCTTTCCCTGATGCCGACTTTC
RrubChr2G00051700.1	IrDML1	ACCTTGCAGTTGCCTTCTCCTC	GCTCTGGTGTCTGTGGCTCTTC
RrubChr4G00108110.1	IrDML2	GCAATGCTCACAACCTCTAATGGC	GGCTCTGGAGATGTCGGAAGTTC
RrubChr3G00060220.1	IrDML3a	GCTCTATGGAAGGAGGTGGTCTG	CCTGTGCTTCTCTTGTGCTATTGC
RrubChr11G00280600.1	IrDML4	TGGAACTACGTCAAGGAGCAAGAAG	TCGGATAGATGCCATTTCTGAGGTC
RrubChr2G00050260.1	IrROS1	TCACCATCCATCCAGCAGAATCTC	TCGTAGACCAACAAGGGCACTTC
