# Supplementary material for: Characterization and differential expression of DNA methyltransferase and demethylase genes in response to abiotic stress in Isodon rubescens
Source: Research Square preprint supplement (doi:10.21203/rs.3.rs-5631078/v1), 2025-04-28
Supplement: Supplementary file 3 [file e93b6a0de6cff7edc82a8672.pdf]

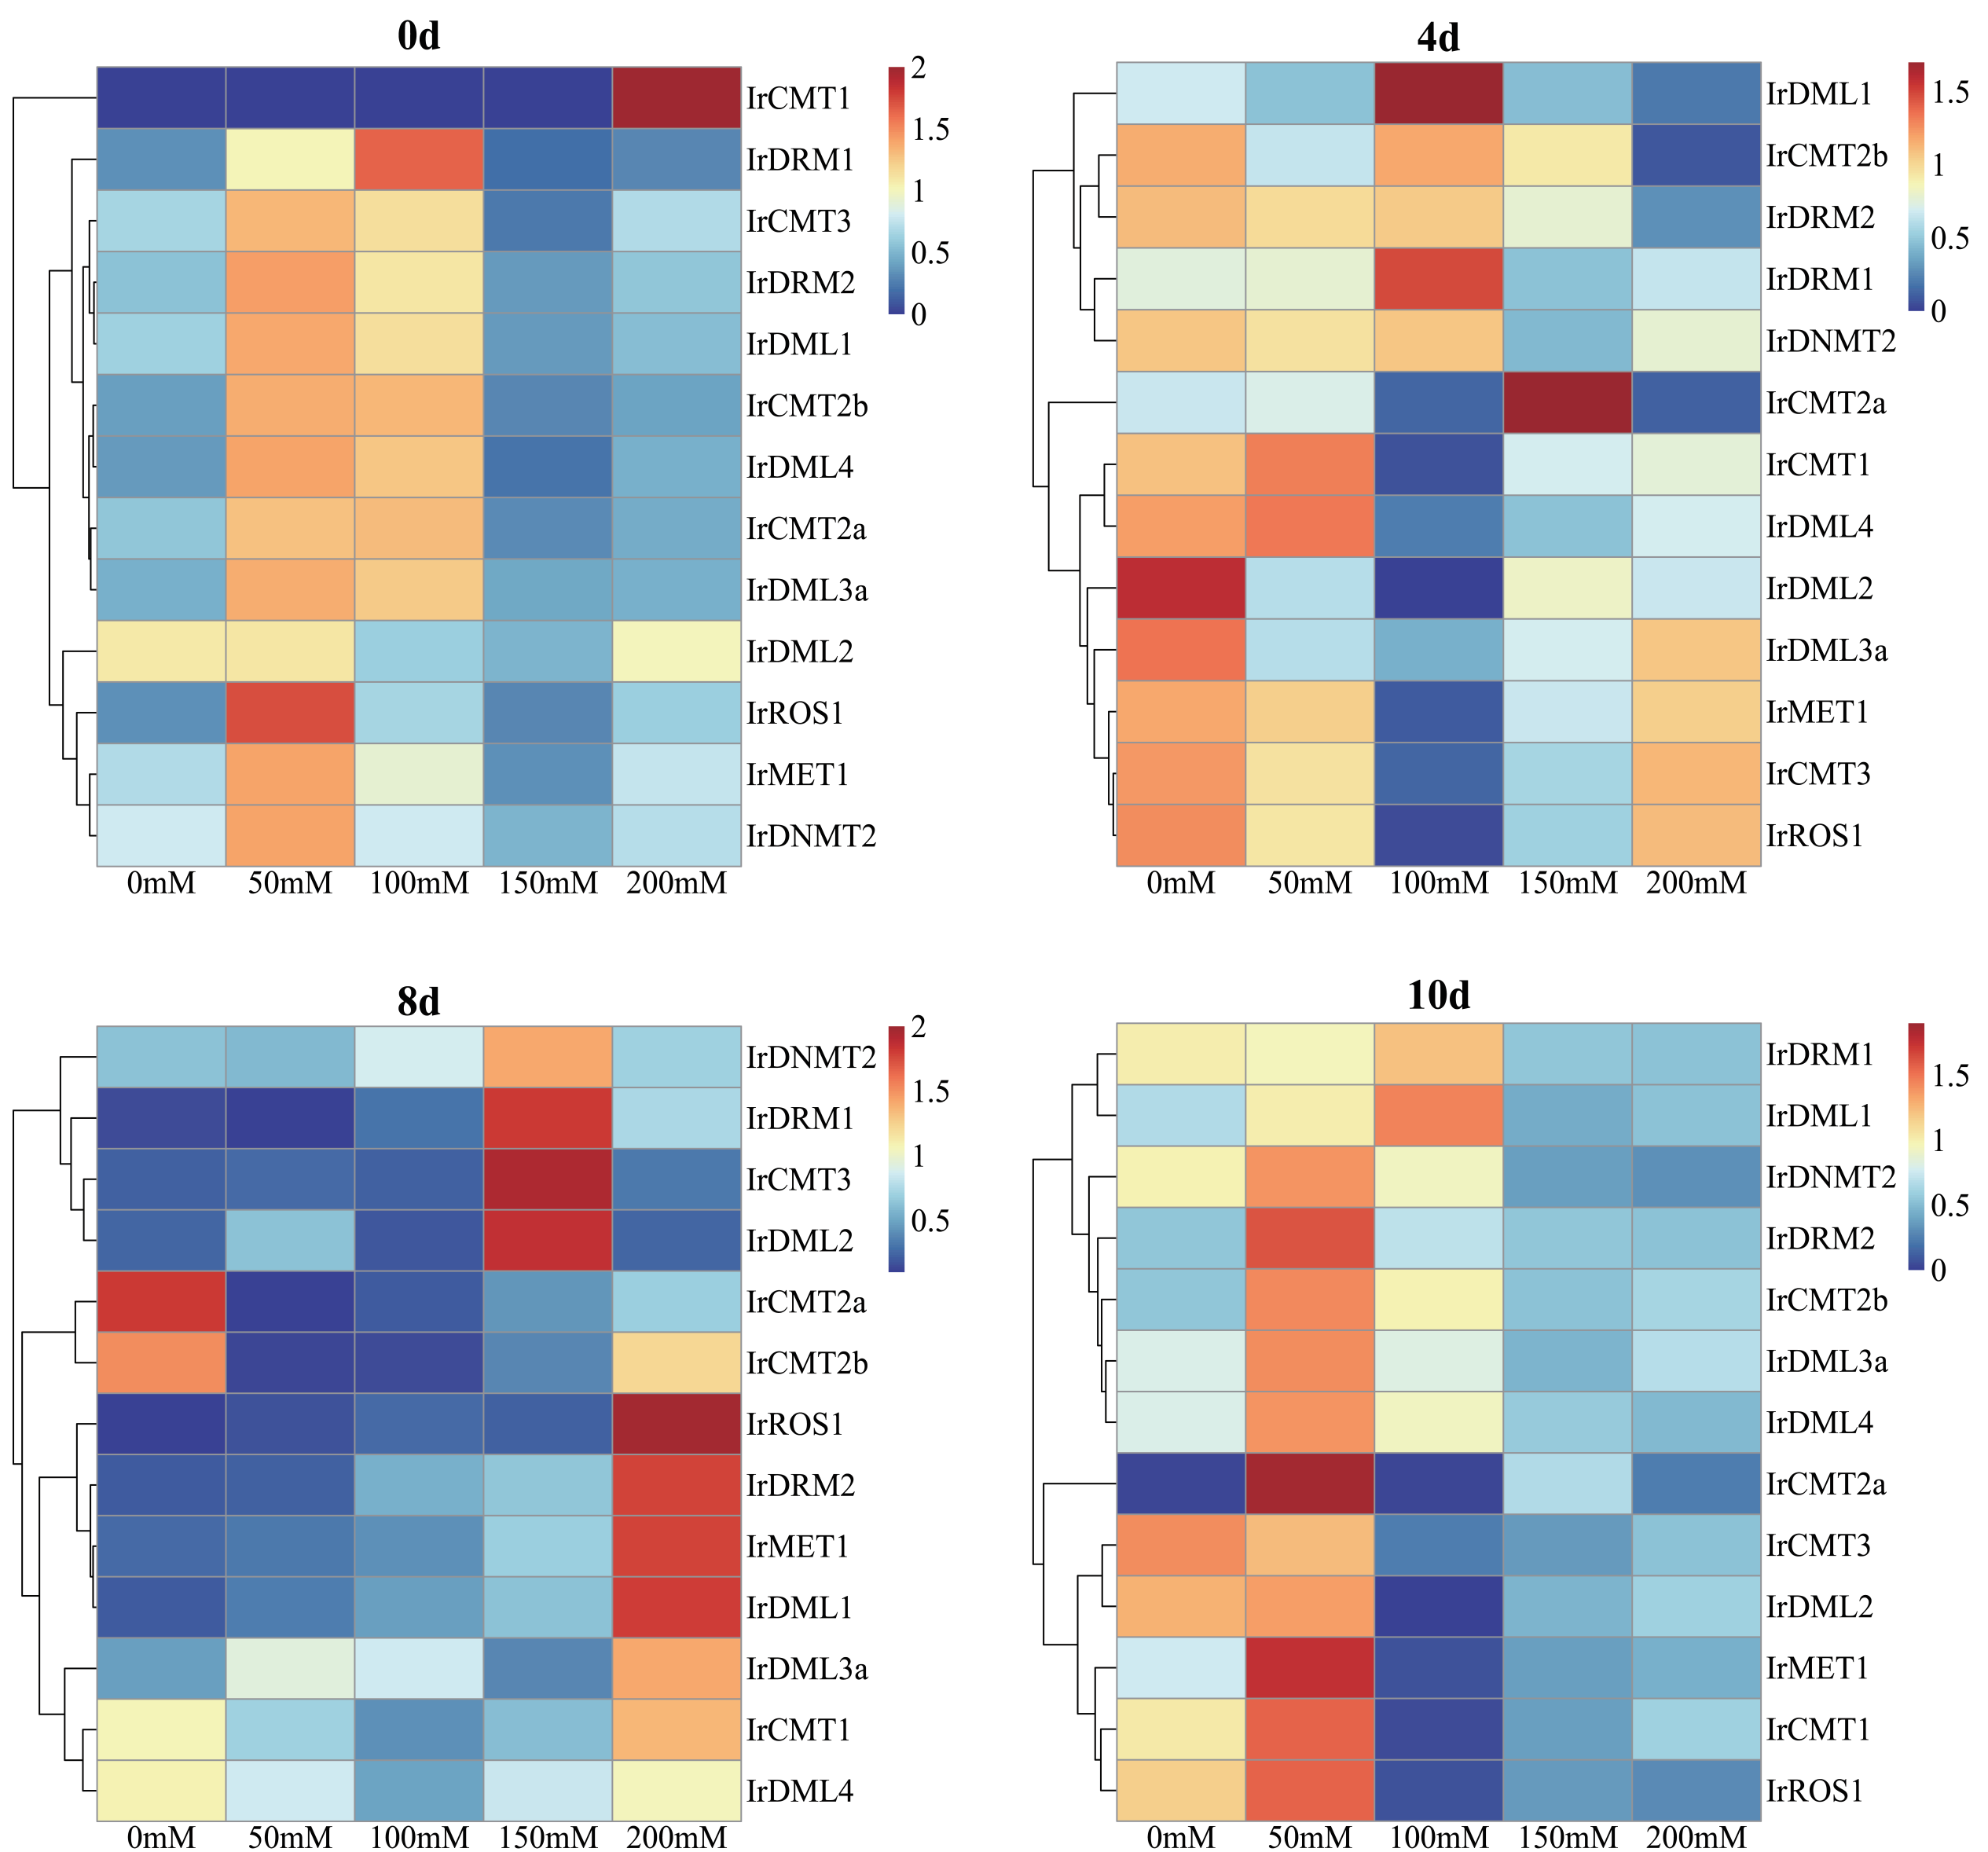

Fig. S10 The relative expression of *IrC5-MTase* and *IrdMTase* in response to different concentrations of NaCl

The heatmap was generated from the standardized average values of the relative expression values of the *IrC5-MTase* and *IrdMTase* genes under different concentrations of NaCl. The redder modules represent higher relative expression, whereas the bluer modules represent lower relative expression.
