# Supplementary material for: Characterization and differential expression of DNA methyltransferase and demethylase genes in response to abiotic stress in Isodon rubescens
Source: Research Square preprint supplement (doi:10.21203/rs.3.rs-5631078/v1), 2025-04-28
Supplement: Supplementary file 4 [file 63c7619b130e5f45efe38410.xlsx]

## Sheet: Sheet1
Table. S1 The information of DNA methylase from different plants exhibited in C5-MTases phylogenetic tree
Gene name	Gene model	Gene name	Gene model
SlDRM1	Solyc02g062740.2.1	AtDRM1	AT5G15380.1
SlDRM2	Solyc04g005250.2.1	AtDRM2	AT5G14620.1
SlDRM3	Solyc10g078190.1.1	AtMET3	AT4G13610.1
SlCMT3b	Sobic.004G197400.1	AtMET2a	AT4G14140.2
SlCMT3a	Sobic.006G214000.1	AtDRM3	AT3G17310.2
SlDNMT2	Solyc08g067070.2.1	AtCMT2	AT4G19020.1
SlMET1	Solyc11g030600.2.1	AtCMT1	AT1G80740.1
SmDRM1	MG602212	AtCMT3	AT1G69770.1
SmDRM2	MG602213	AtDNMT2	AT5G25480.1
SmMET1	MG602207	AtMET2b	AT4G08990.1
SmDNMT2	MG602214	AtMET1	AT5G49160.1
SmCMT2b	MG602210	ZmDRM2	GRMZM2G137366_T01
SmCMT2a	MG602209	ZmDRM1	GRMZM2G092497_T05
SmCMT1	MG602211	ZmDRM3	GRMZM2G065599_T01
SmCMT3	MG602208	ZmMET1	GRMZM2G334041_T01
OsMET1	LOC_Os07g08500.1	ZmMET2	GRMZM2G333916_T01
OsMET2	LOC_Os03g58400.1	ZmDNMT2	GRMZM2G157589_T01
OsDRM2	LOC_Os11g01810.1	ZmCMT3a	GRMZM2G025592_T01
OsDRM1	LOC_Os03g02010.4	ZmCMT3b	GRMZM2G005310_T02
OsDRM3	LOC_Os05g04330.1	DoMET1	Dca001068
OsCMT3	LOC_Os10g01570.1	DoCMT1	Dca005086
CpCMT2	CpaM1st29183	DoCMT2	Dca003680
CpCMT3	CpaM1st09643	DoCMT3	Dca021108
CpMET	CpaM1st19889	DoDRM1	Dca019831
CpDRM1	CpaM1st24345	DoDRM2	Dca002179
CpDRM2	CpaM1st34737	DoDRM3	Dca020469
CpDNMT2	CpaM1st31201	DoDNMT2	Dca009405
