# Supplementary material for: Characterization and differential expression of DNA methyltransferase and demethylase genes in response to abiotic stress in Isodon rubescens
Source: Research Square preprint supplement (doi:10.21203/rs.3.rs-5631078/v1), 2025-04-28
Supplement: Supplementary file 5 [file 9549f726a45804e8aa1aae12.xlsx]

## Sheet: Sheet1
Table S5. The contents of oridonin, lasiodonin, rosthorin A, and rosmarinic acid in I. rubescens under different 5-azaC treatments
5-azaC	Lasiodonin (%)	Rosthorin A (%)	Rosmarinic acid (%)	Oridonin (%)
0μM	0.16	0.16	0.04	0.36
10μM	0.08	0.11	0.1	0.33
50μM	0.24	0.14	0.11	0.37
100μM	0.27	0.16	0.12	0.4
200μM	0.27	0.22	0.41	0.6
300μM	0.4	0.23	0.18	0.56
