# Supplementary material for: Characterization and differential expression of DNA methyltransferase and demethylase genes in response to abiotic stress in Isodon rubescens
Source: Research Square preprint supplement (doi:10.21203/rs.3.rs-5631078/v1), 2025-04-28
Supplement: Supplementary file 6 [file f8eb5085ea3e1faec4685d5e.xlsx]

## Sheet: Sheet1
Table S2. The information of DNA demethylation from different plants exhibited in dMTase phylogenetic tree
Gene name	Gene model	Gene name	Gene model
AtDME	AT5G04560	GmDME	Glyma.20G188300
AtDML2	AT3G10010	GmROS1b	Glyma.10G065900
AtDML3	AT4G34060	GmROS1c	Glyma.13G151000
AtROS1	AT2G36490	MeDME1	Manes.07G091800
SmDML1	MG602215	MeDME2	Manes.10G055200
SmDML2	MG602216	MeDML3	Manes.04G008900
SmDML3	MG602217	MeROS1a	Manes.09G060800
SmDML4	MG602218	MeROS1b	Manes.08G020500
SmDML5	MG602219	ZmDML3	GRMZM5G828460
SmDML6	MG602220	ZmROS1a	GRMZM2G131756
PtDME1	Potri.010G234400	ZmROS1b	GRMZM2G422464
PtDME2	Potri.008G025900	DoDML3	Dca014673
PtROS1	Potri.006G116000	DoROS1a	Dca024052
CpROS1	CpaM1st40636	DoROS1b	Dca020504
CpDME1	CpaM1st11558
CpDME2	CpaM1st16411
IrDML1	RrubChr2G00051700
IrDML2	RrubChr4G00108110
IrDML3a	RrubChr3G00060220
IrDML4	RrubChr11G00280600
IrROS1	RrubChr2G00050260
