# Supplementary figures and images for: Characterization and differential expression of DNA methyltransferase and demethylase genes in response to abiotic stress in Isodon rubescens
Source: Research Square preprint supplement (doi:10.21203/rs.3.rs-5631078/v1), 2025-04-28

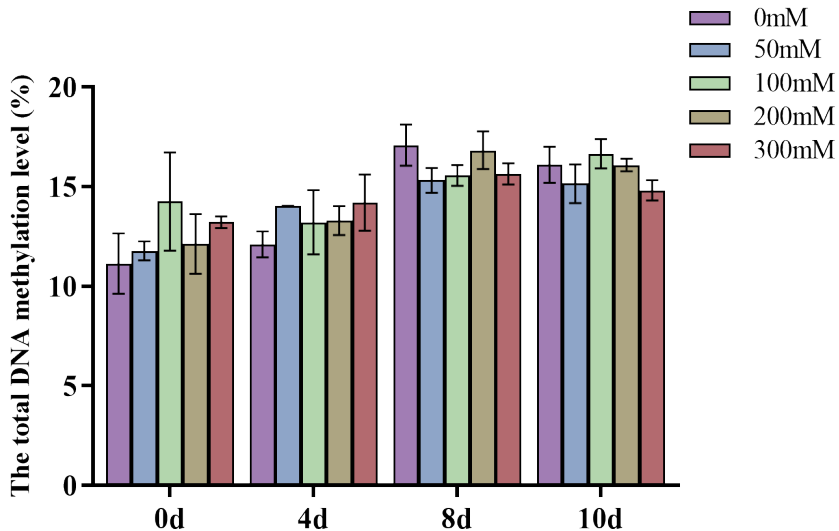

Fig. S9 DNA methylation level in *I. rubescens* in response to different concentrations of NaCl

Supplement: Supplementary file 2 [file 2b00a3b5588f5274729c189e.pdf]
